# Supplementary material for: Hierarchically structured polymeric ionic liquids and polyvinylpyrrolidone mat-fibers fabricated by electrospinning
Source: Royal Society of Chemistry journal article supplement (doi:10.1039/c7ta02447a), 2017-01-01
Supplement: c7ta02447a1.pdf [file c7ta02447a1.pdf]

## Electronic Supplementary Information

### Hierarchically structured Polymeric Ionic Liquids and Polyvinylpyrrolidone mat-fibers fabricated by electrospinning

Silvia Montolio,<sup>a</sup> Gabriel Abarca,<sup>b</sup> Raúl Porcar,<sup>a</sup> Jairton Dupont,<sup>c</sup> María Isabel Burguete,<sup>a</sup> Eduardo García-Verdugo,<sup>\*a</sup> and Santiago V. Luis<sup>\*a c</sup>

<sup>a</sup> *Universidad Jaume I, Departamento de Química Inorgánica y Orgánica, Campus del Riu Sec, E-12071 Castellón, Spain*

<sup>b</sup> *Laboratory of Molecular Catalysis, Institute of Chemistry – UFRGS, Avenida Bento Gonçalves, 9500, Porto Alegre 91501-970 RS Brazil*

<sup>c</sup> *School of Chemistry, University Park, Nottingham, NG7 2RD, UK*

#### Table of Contents

|                                                                        |     |
|------------------------------------------------------------------------|-----|
| Electrospinning equipment                                              | S2  |
| Microscope and SEM images of films                                     | S3  |
| Viscosity results                                                      | S10 |
| TGA and DSC results                                                    | S12 |
| Oil/water separation process                                           | S13 |
| SEM and TEM images of AuNPs-films                                      | S14 |
| Diffuse UV-Vis analysis                                                | S18 |
| Structural characterization of PILs: <sup>1</sup> H-NMR and IR spectra | S19 |

## Electrospinning equipment

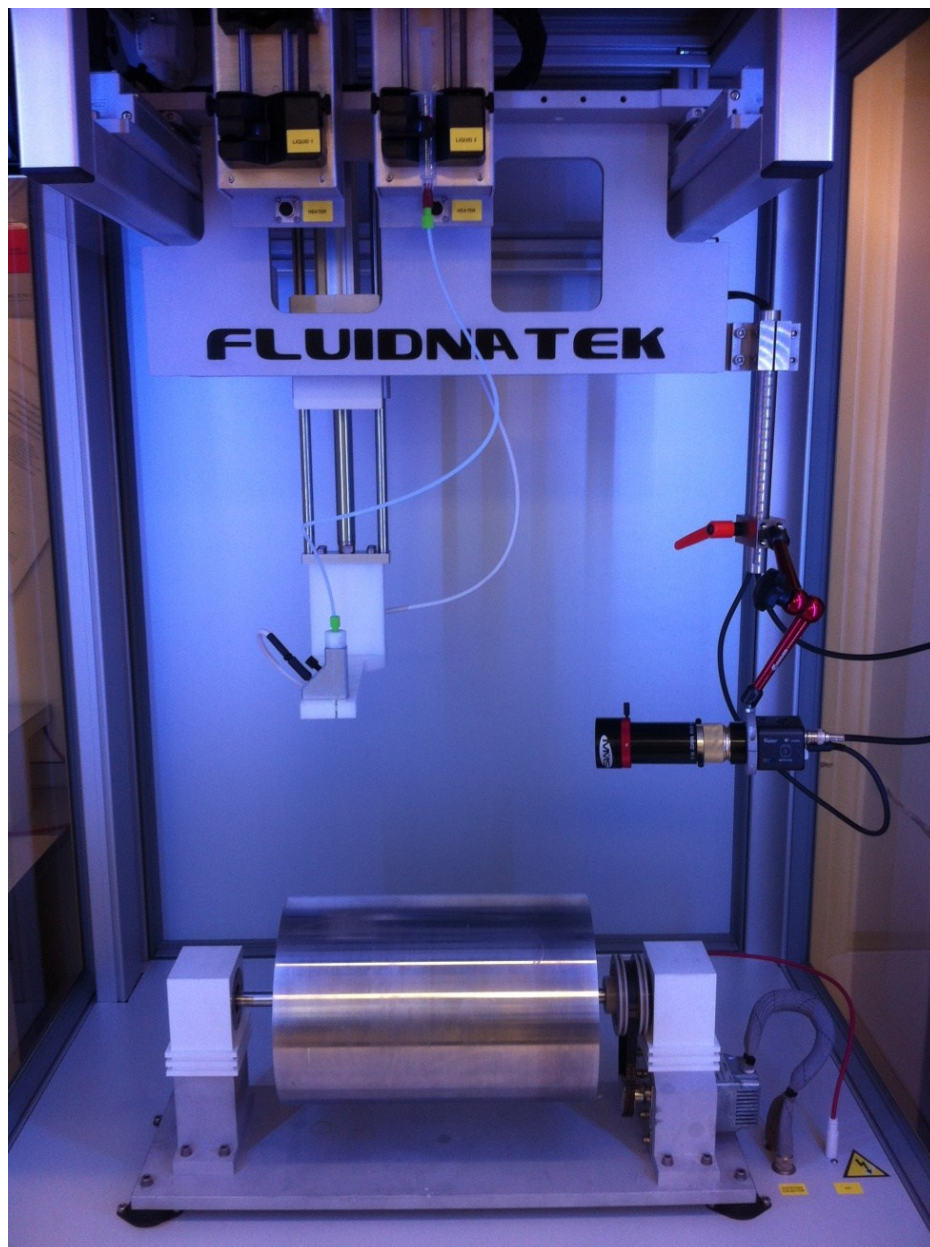

**Figure S1.** Image of the electrospinner Fluidnatek LE 100.V1, BioInicia.

## Microscope and SEM images of films

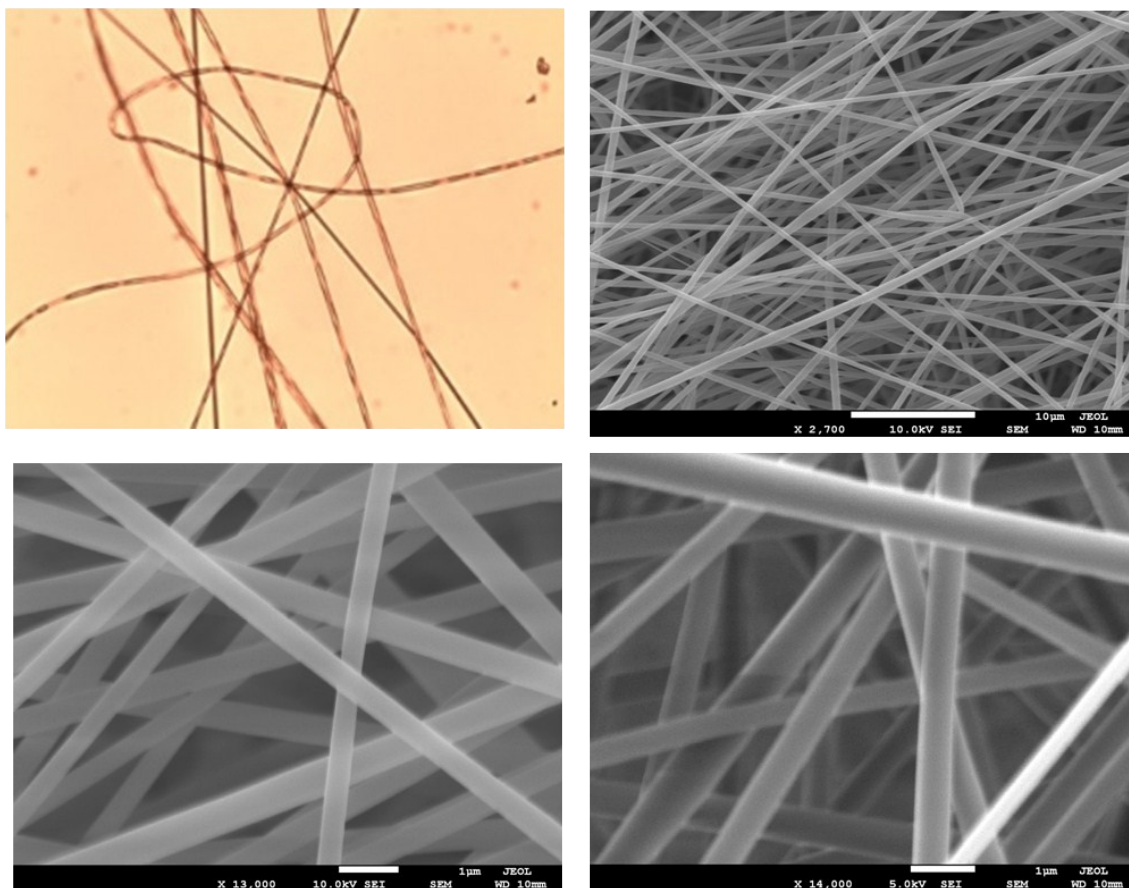

**Figure S2.** Microscope and SEM images for film 2/PVP.

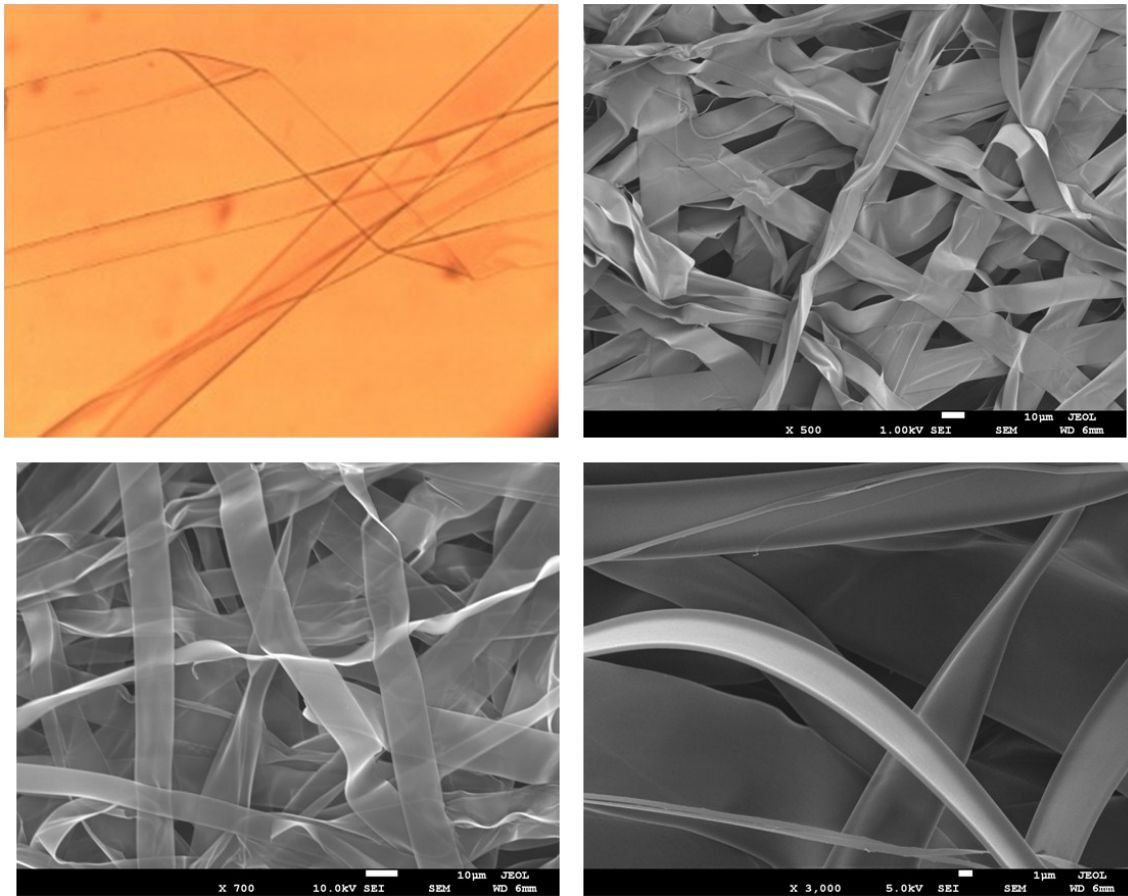

**Figure S3.** Microscope and SEM images for film 4a/PVP.



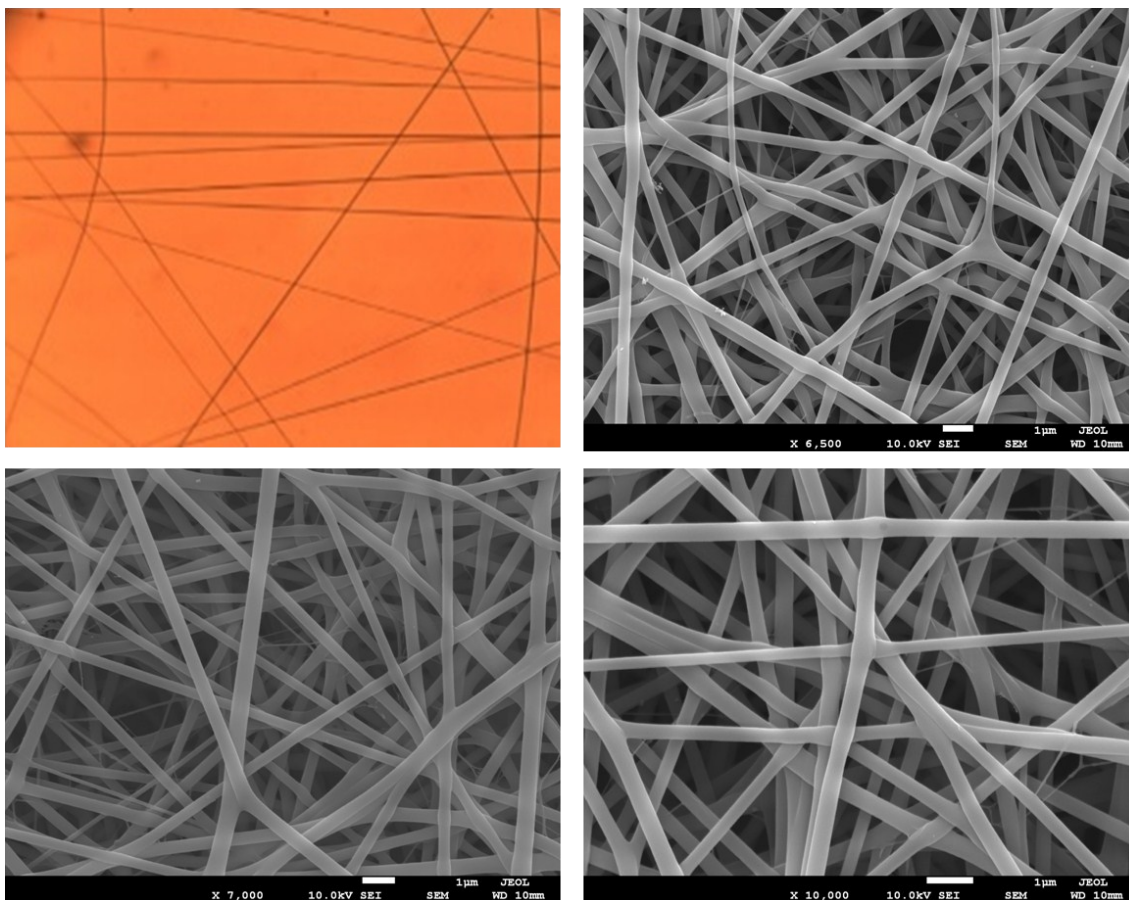

**Figure S4.** Microscope and SEM images for film **5a/PVP**.

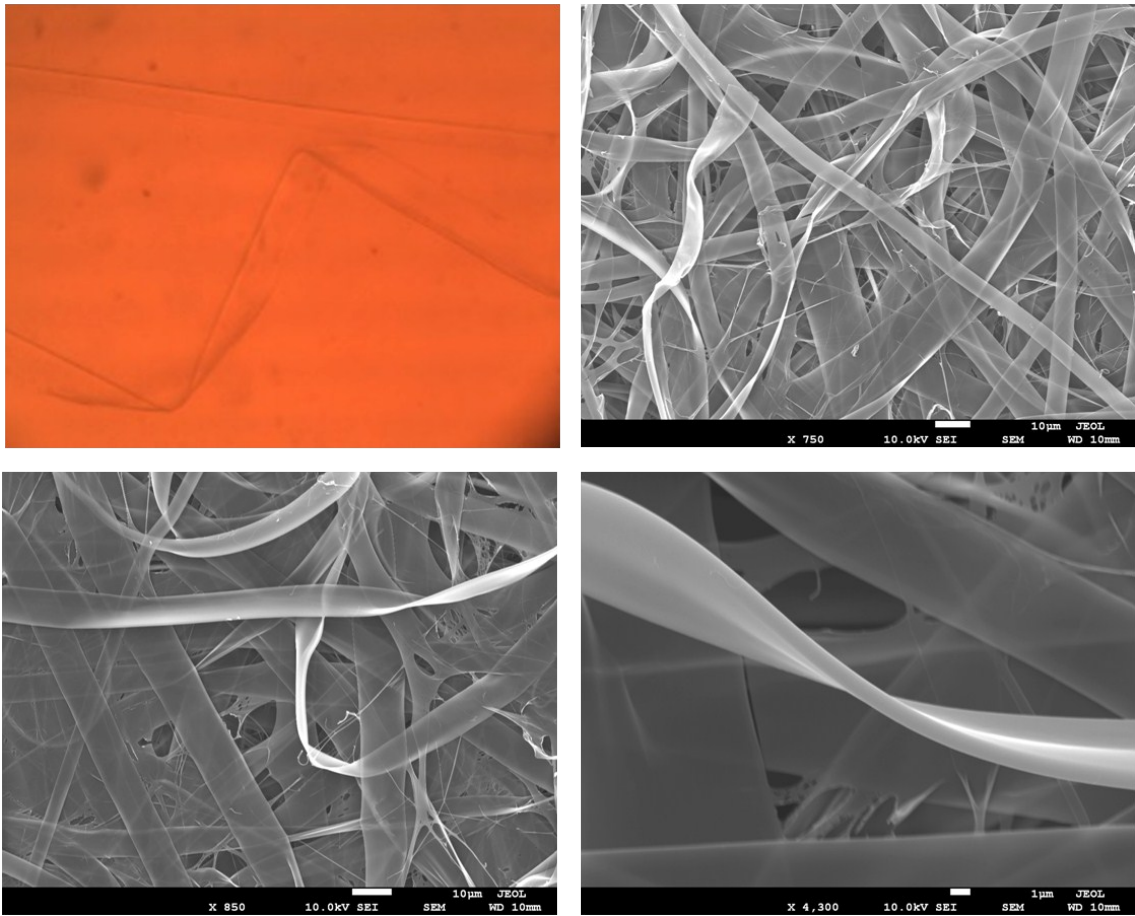

**Figure S5.** Microscope and SEM images for film **4b/PVP**.

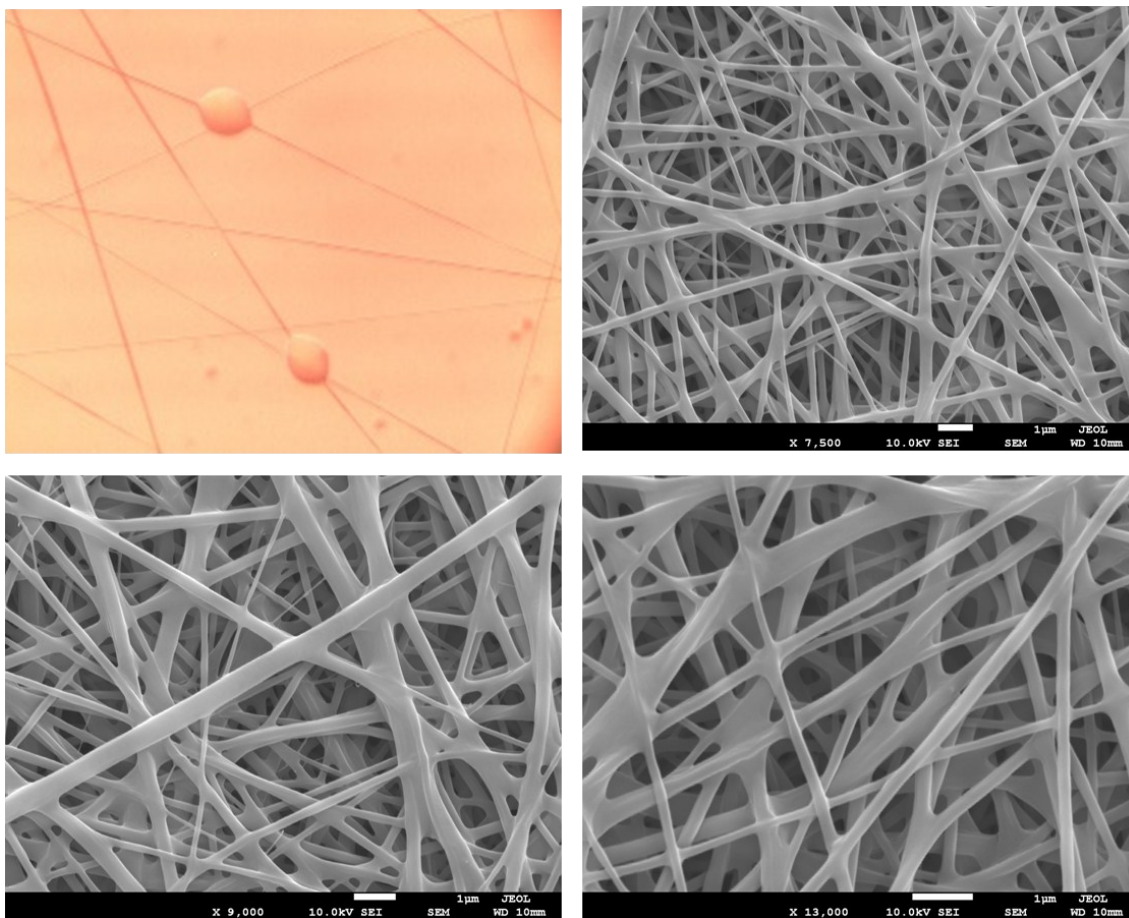

**Figure S6.** Microscope and SEM images for film **5b/PVP**.

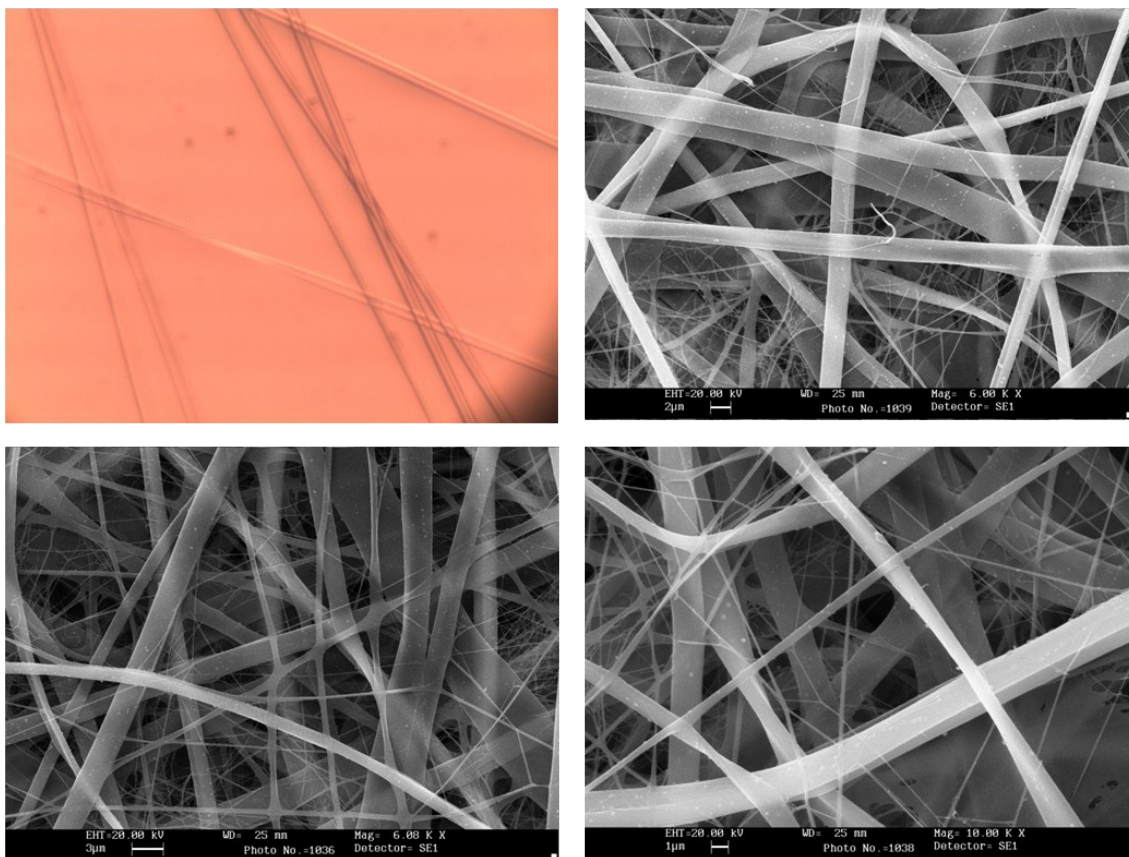

**Figure S7.** Microscope and SEM images for film **6a/PVP** (ribbons size 2.03  $\mu\text{m}$ ).



a)

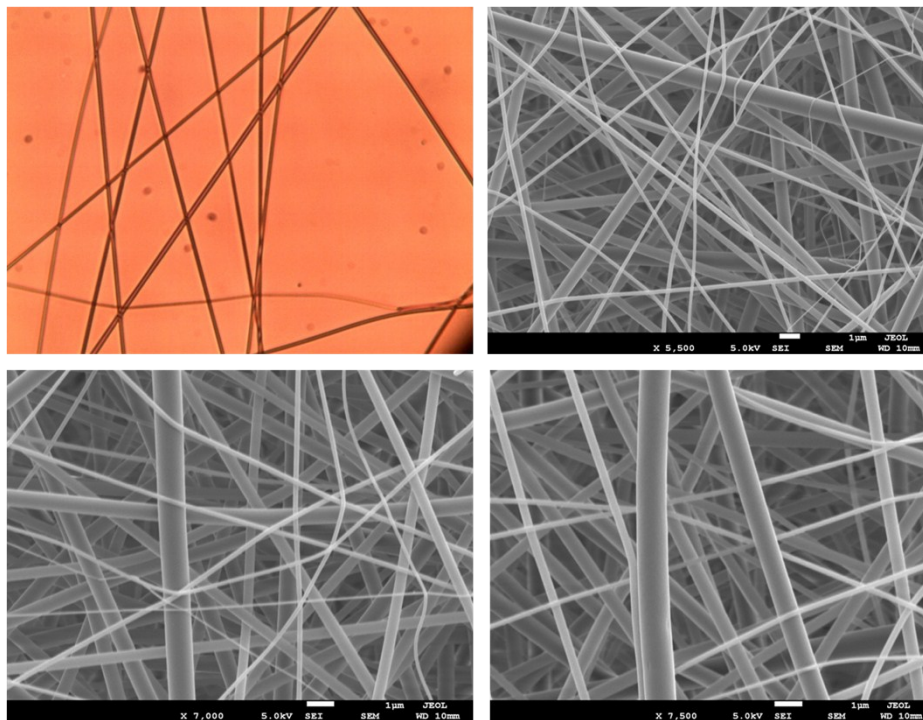

b)

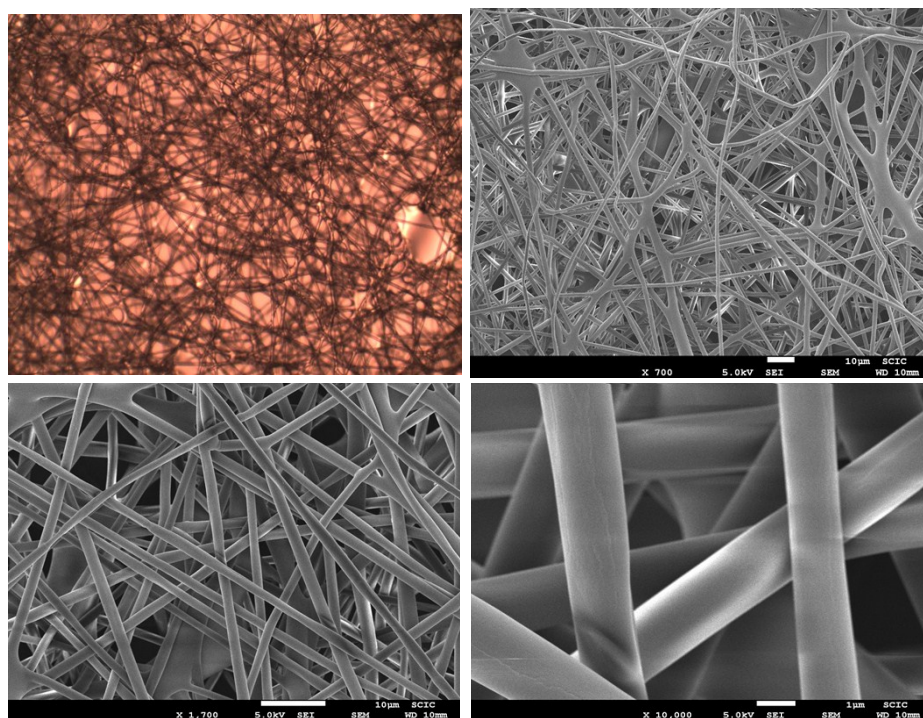

**Figure S8.** Microscope and SEM images for film PVP. a) electrospun from MeOH solution (fine fibers size 0.2  $\mu\text{m}$  and big fibers size 0.6  $\mu\text{m}$ ). b) electrospun from DMF solution (fine fibers size 1.7  $\mu\text{m}$ ).

## Viscosity results

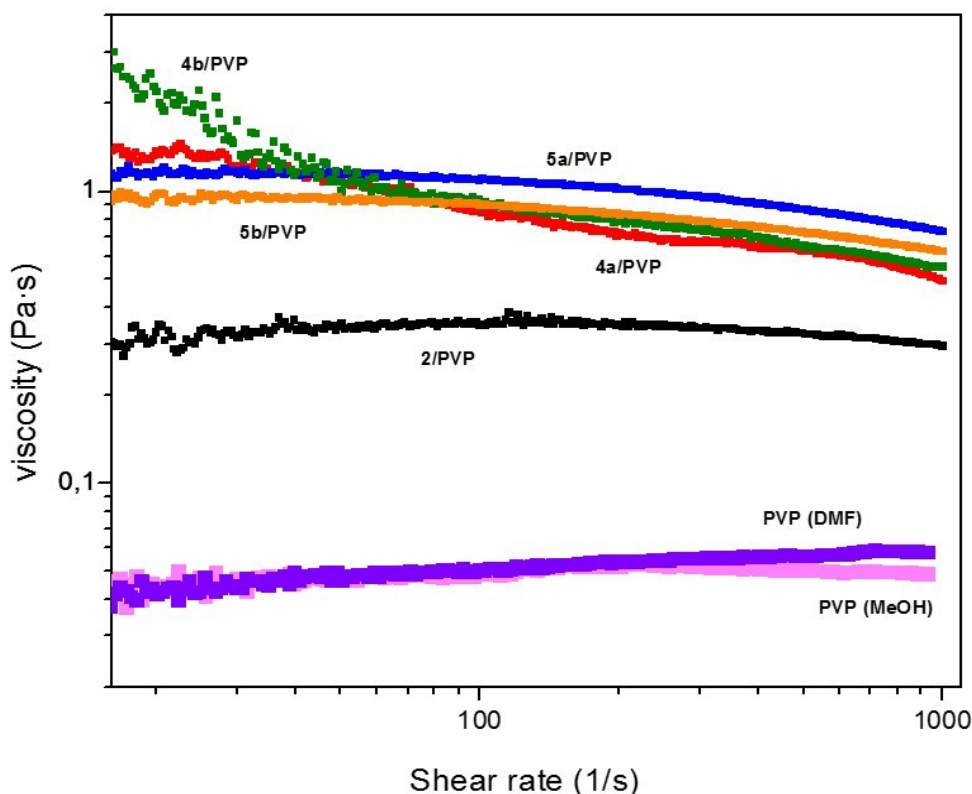

**Figure S9.** Viscosity obtained for the different polymeric mixtures showed in Table 1.

The behavior of the viscosity as a function of shear rate differs for the different mixtures as observed in Figure S9. Thus, the mixture formed by **2/PVP** shows a quasi-newtonian behavior, displaying a minimum change with the shear rate. A partly related curve is observed for **5a/PVP** and **5b/PVP** containing  $\text{NTf}_2^-$  as the counteranion. In this case, the viscosity values are always significantly higher than those of **2/PVP** and only display a minor decrease with shear rate. A very different pattern is detected, however, for **4a/PVP** and **4b/PVP** containing  $\text{Cl}^-$  as the counteranion. In this case, the viscosity detected at low shear rates is higher than the one measured for **5a/PVP** and **5b/PVP**, but experiment a sharp decrease with the initial increments in shear rate. This is particularly relevant for **4b/PVP** containing  $\text{Cl}^-$  as the counteranion and octyl as the N-substitution in the imidazolium fragment, revealing that both coulombic/hydrogen bonding and hydrophobic interactions contribute to this behavior. This suggests the presence of very strong interactions in the mixture through the combination of these two structural elements. This is confirmed when the viscosity of the PVP solutions in either MeOH or DMF was study. The values of viscosity are significantly lower at least one order of magnitude ( $< 0.005 \text{ Pa s}$ ) in comparison than those found for the different polymeric mixtures confirming the strong interaction between the polymers forming the mixture

## TGA results

a)

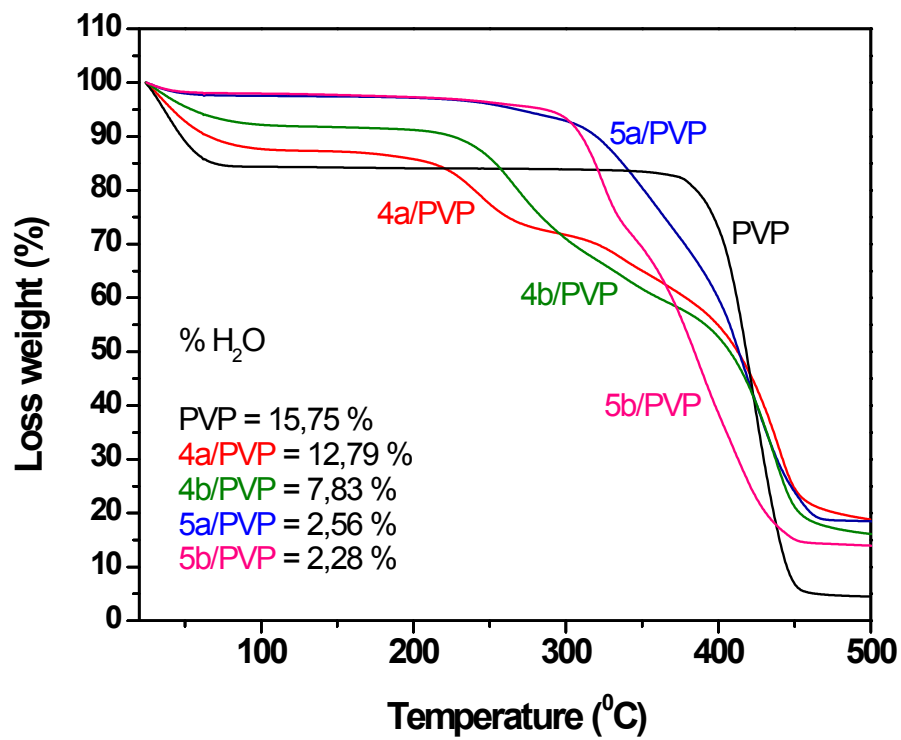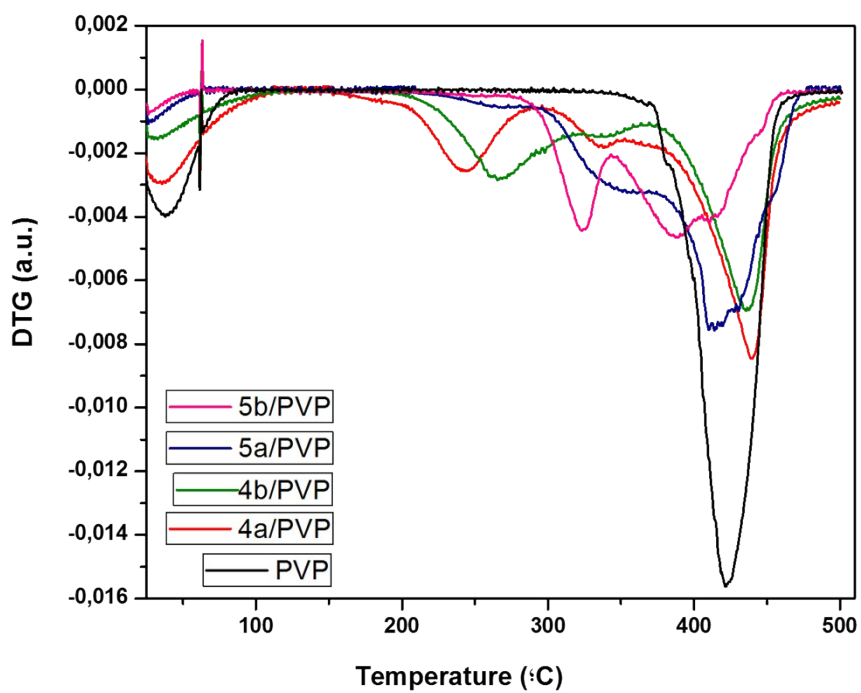

b)

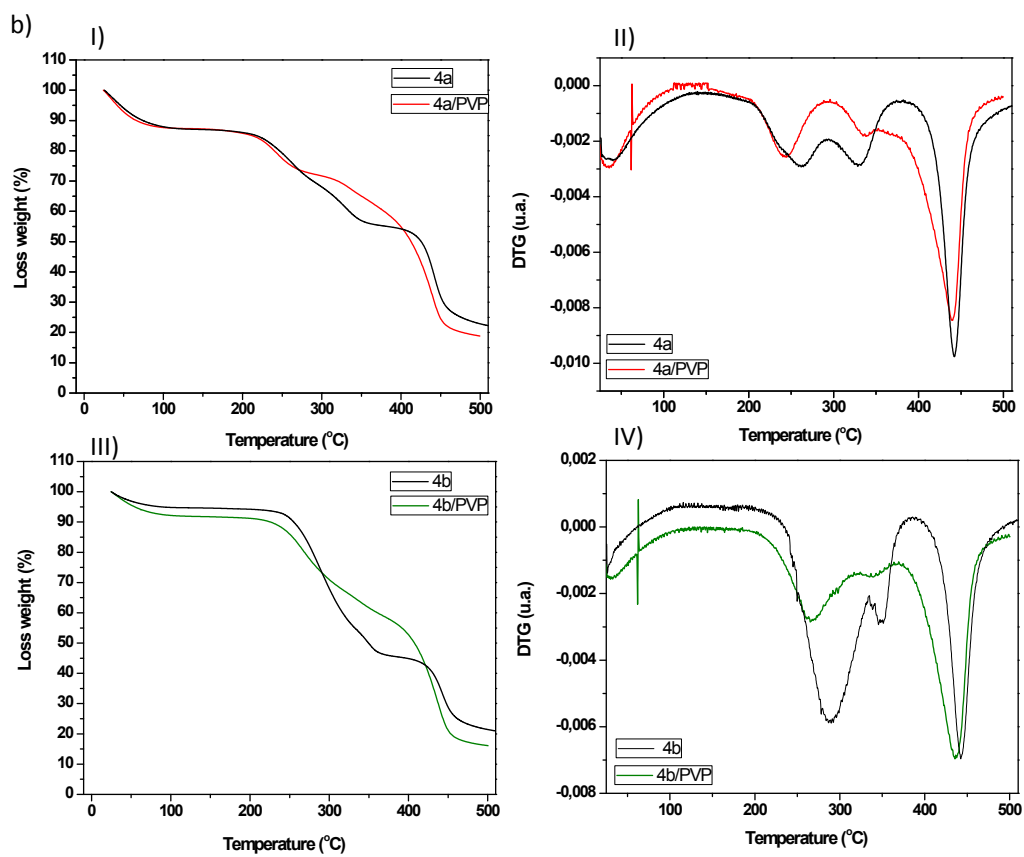

**Figure S10.** a) TGA (top) and DTA (bottom) obtained for the electrospun mats formed.  
b) TGA (right) and DTA (left) obtained for the electrospun mats and the related PILs for **4a** (top) and **4b** (bottom).



## DSC results

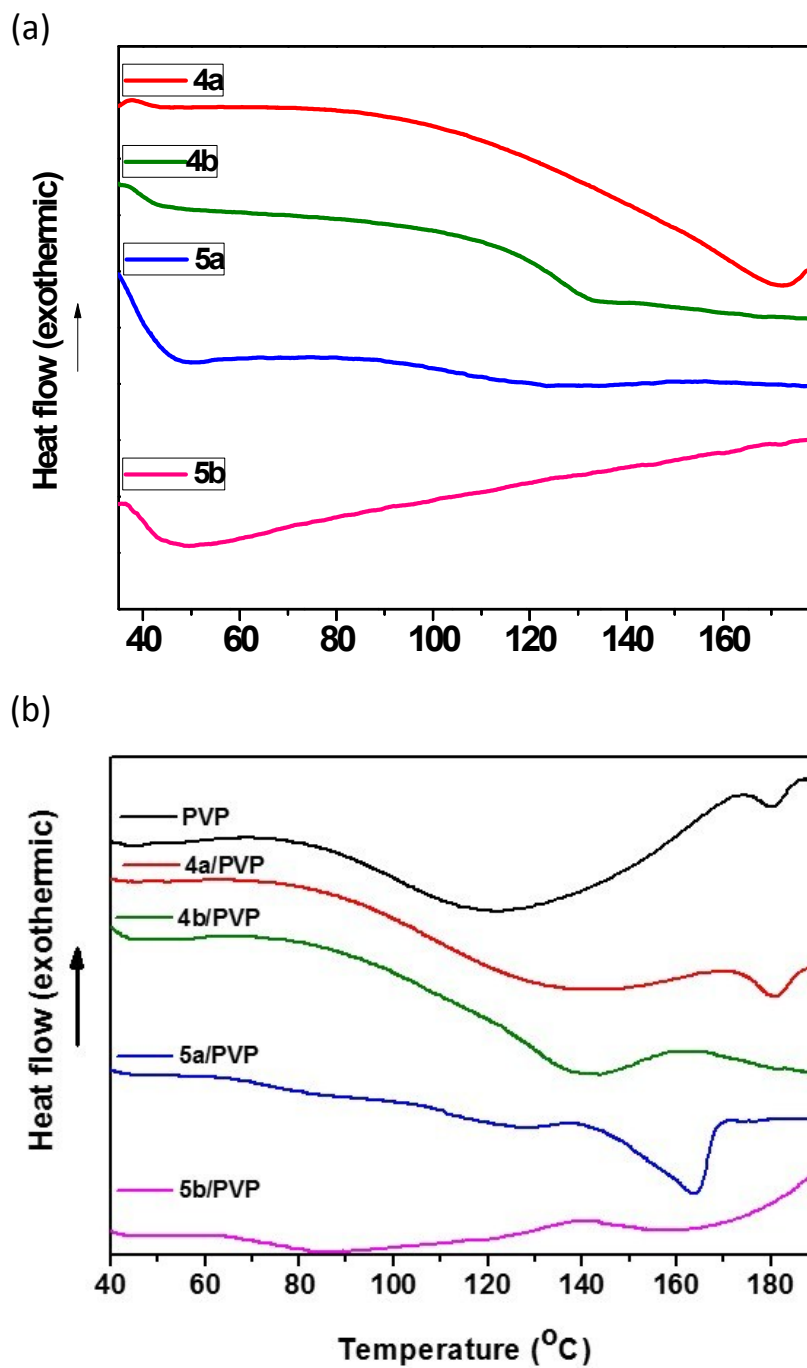

**Figure S11.** DSC for the PILs (a) and the different electrospun mats formed (b) (second heating cycle).

## Oil/water separation process

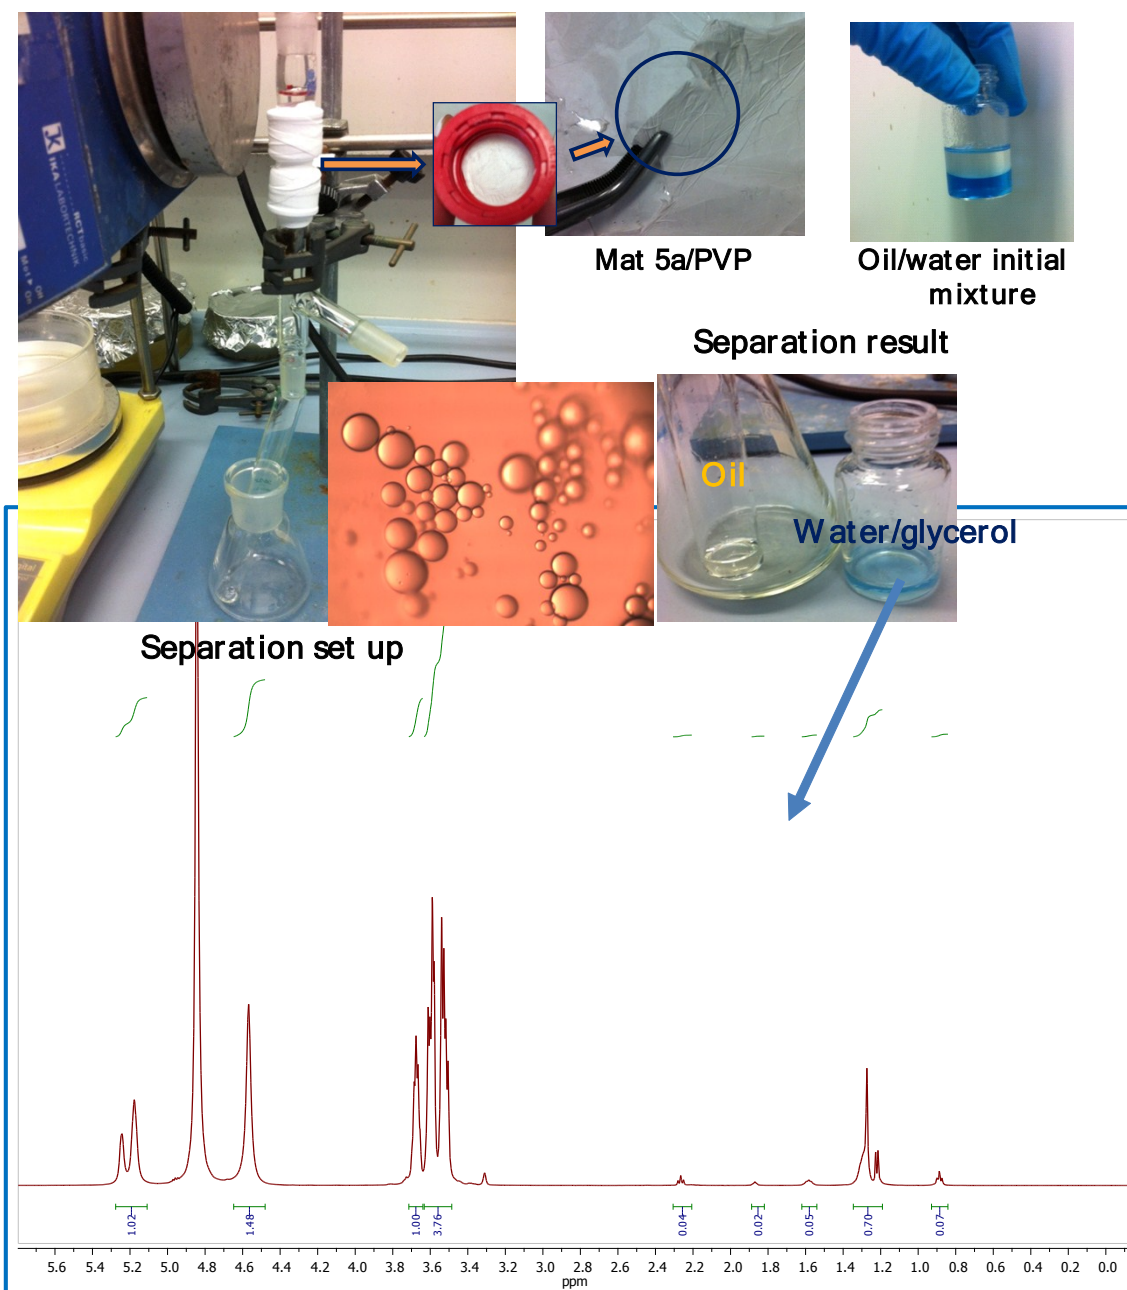

**Figure S12.** Separation of an oil / water emulsion and oil / glycerol/ water emulsion.  $^1\text{H}$  (DMSO) of the water/glycerol Phase obtained after separation..

## SEM and TEM images of AuNPs-films

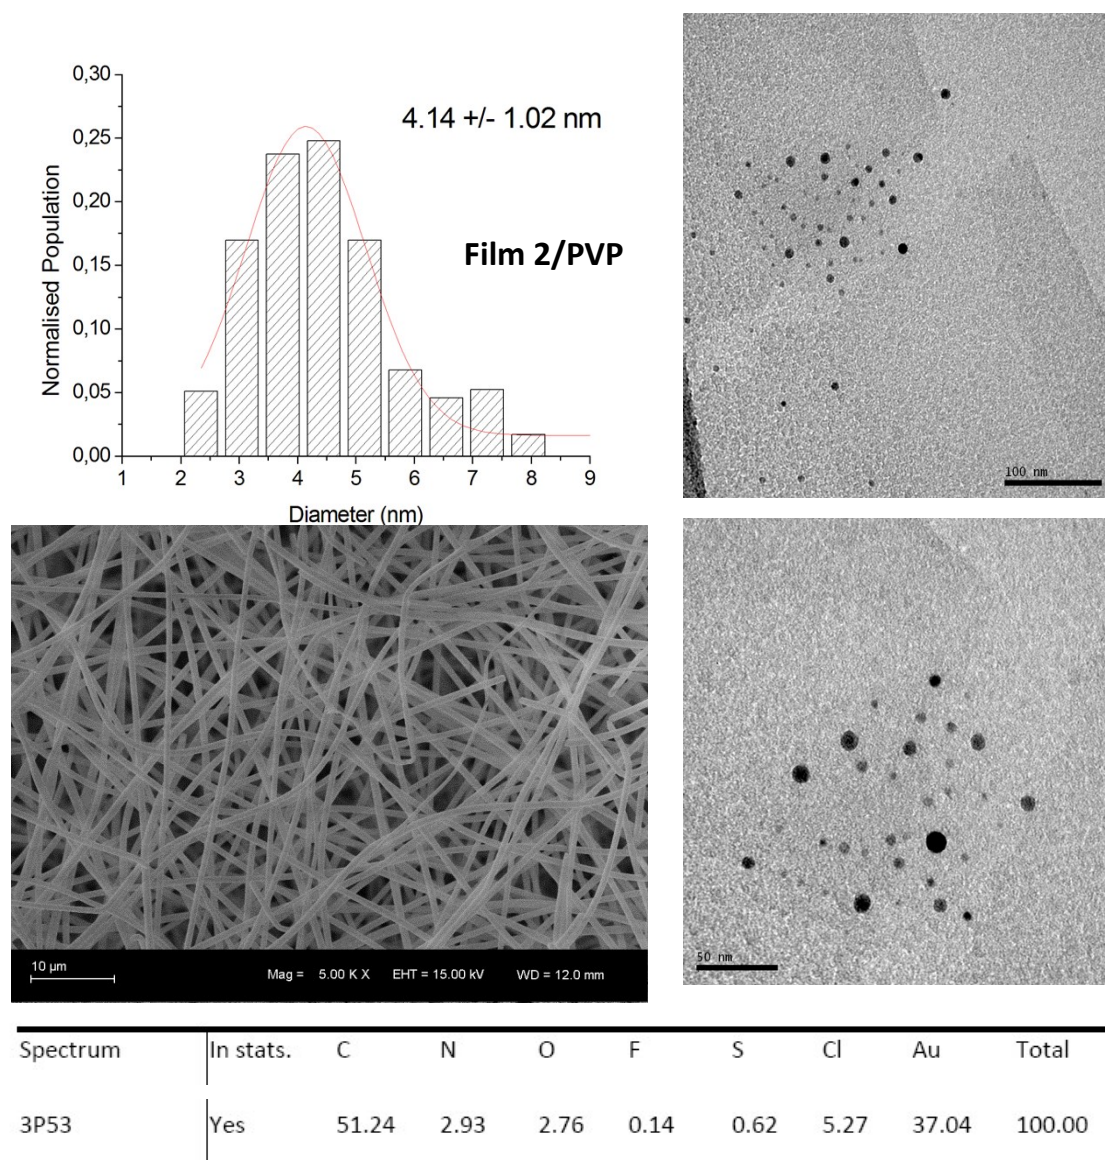

**Figure S13.** SEM picture of the film **2/PVP**. TEM images of the AuNPs obtained after dispersing the film **AuNPs-2/PVP** in ethanol at 25 °C and the corresponding histogram and surface composition obtained by EDX analyses over the fibers after sputtering deposition.

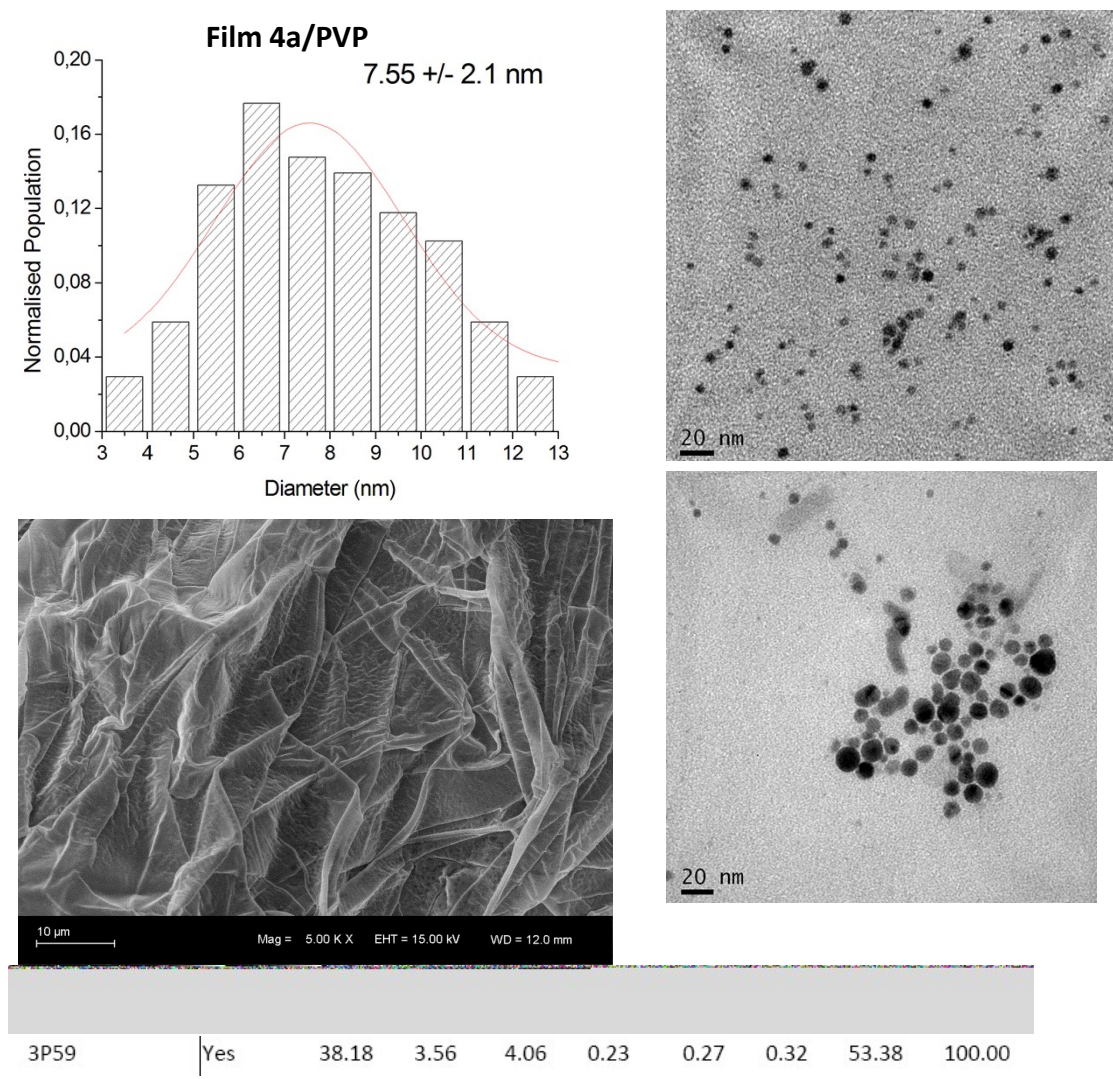

**Figure S14.** SEM picture of the film **4a/PVP**. TEM images of the AuNPs obtained after dispersing film **AuNPs-4a/PVP** in ethanol at 25 °C and the corresponding histogram and surface composition obtained by EDX analyses over the fibers after sputtering deposition.



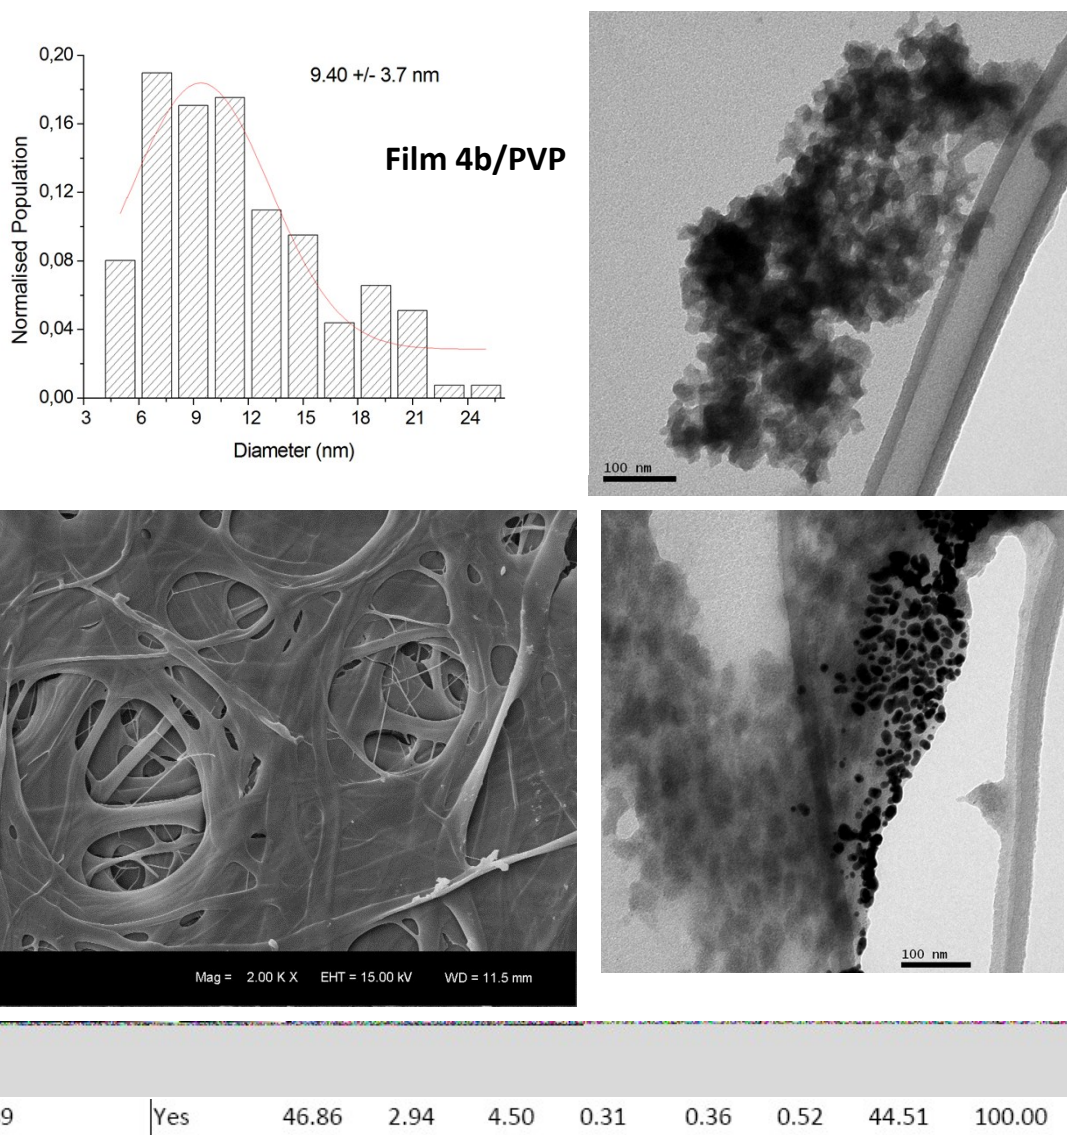

**Figure S15.** SEM picture of the film **4b/PVP**. TEM images of the AuNPs obtained after dispersing film **AuNPs-4b/PVP** in ethanol at 25 °C and the corresponding histogram and surface composition obtained by EDX analyses over the fibers after sputtering deposition.

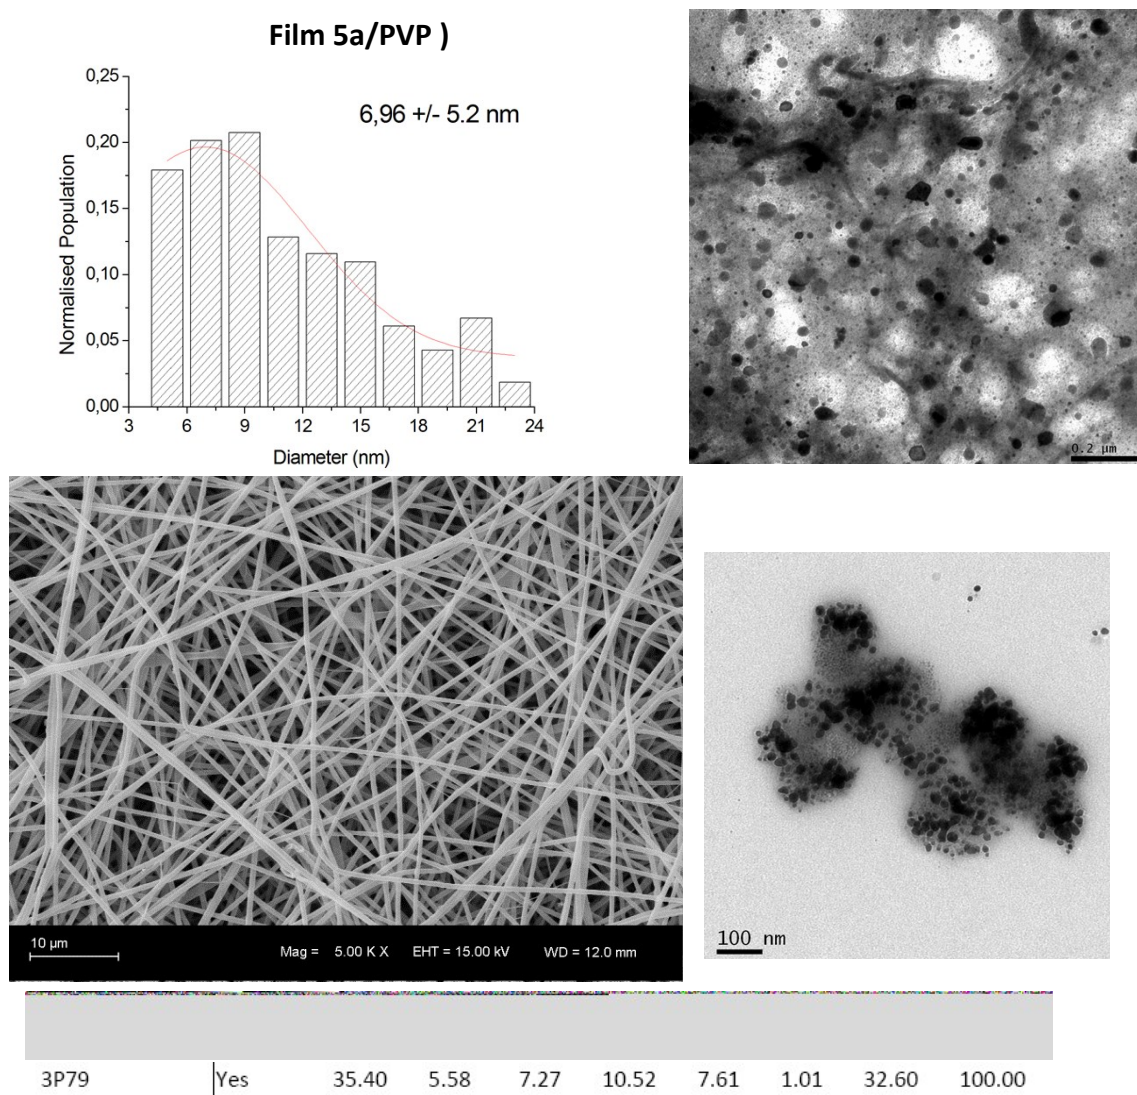

**Figure S16.** SEM picture of the film **5a/PVP**. TEM images of the AuNPs obtained after dispersing film **AuNPs-5a/PVP** in ethanol at 25 °C and the corresponding histogram and surface composition obtained by EDX analyses over the fibers after sputtering deposition.

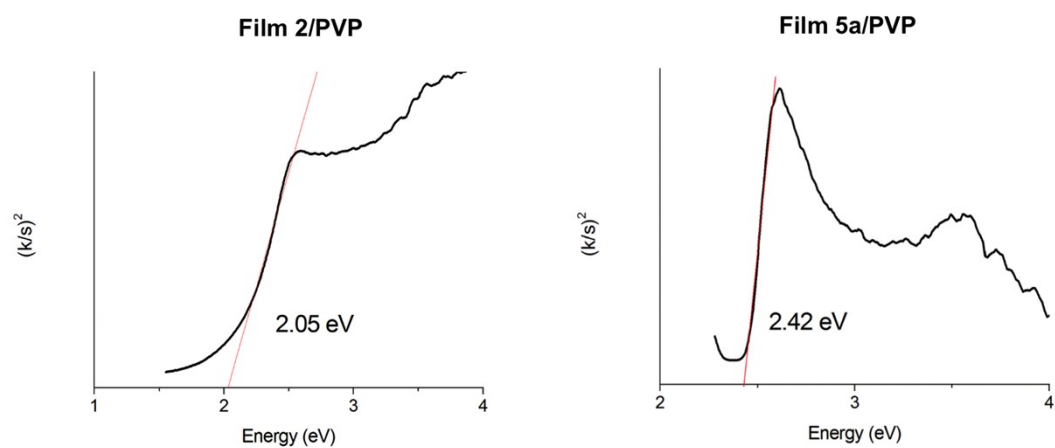

**Figure S17.** Diffuse UV-Vis analysis for the band gap determination of AuNPs supported onto nanostructured films.

## Structural characterization of PILs: $^1\text{H-NMR}$ and IR spectra

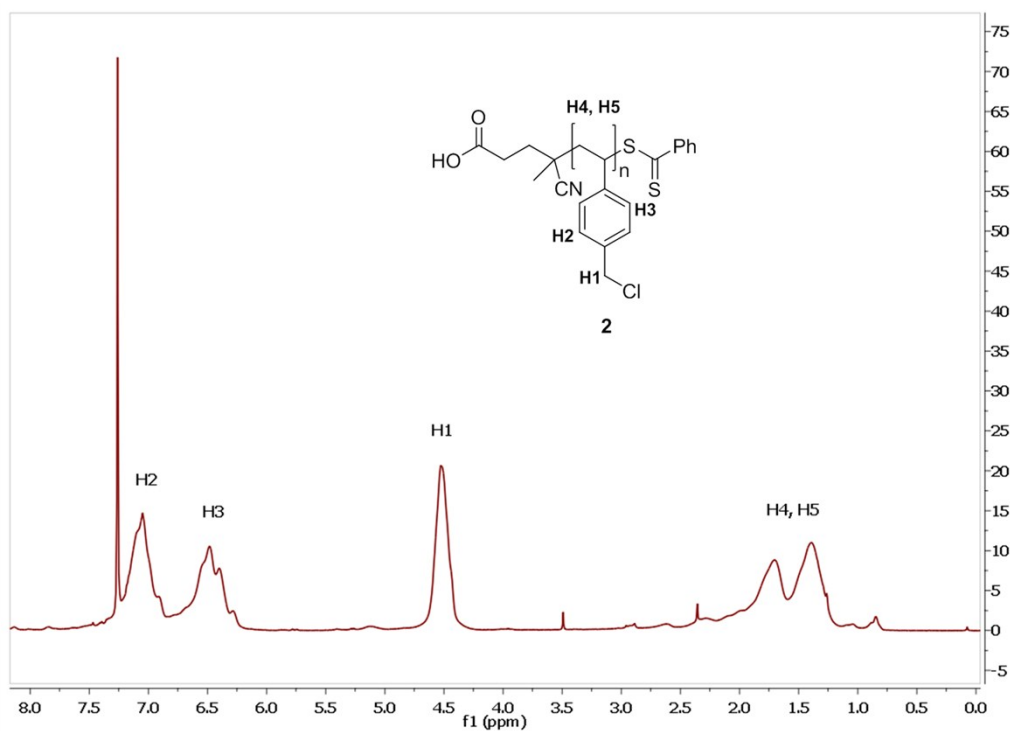

**Figure S18.**  $^1\text{H-NMR}$  (500 MHz) with peak assignments for **2** ( $\text{CDCl}_3$ )

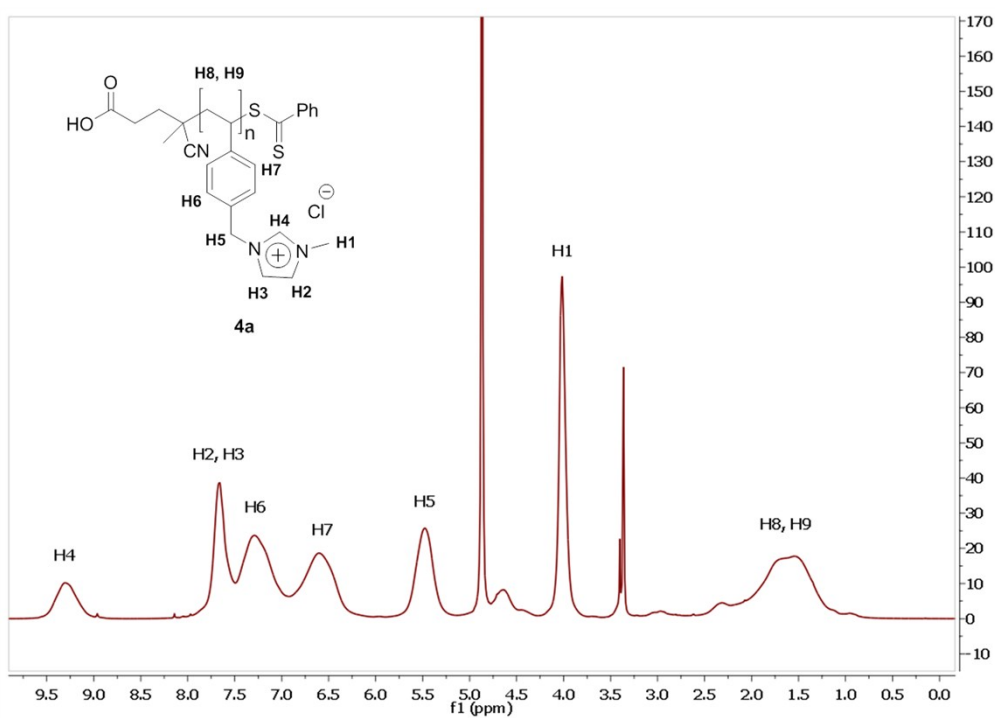

**Figure S19.**  $^1\text{H-NMR}$  (500 MHz) with peak assignments for PIL-**4a** (MeOD)



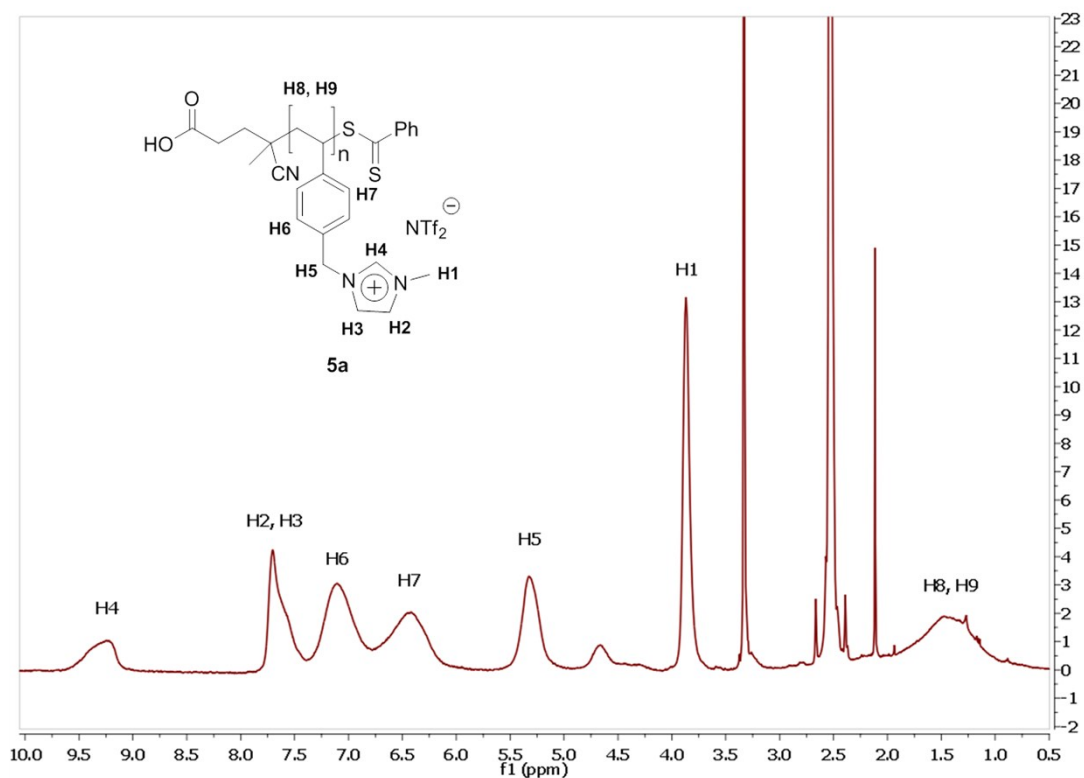

**Figure S20.**  $^1\text{H-NMR}$  (500 MHz) with peak assignments for **PIL-5a** ( $\text{DMSO-}d_6$ )

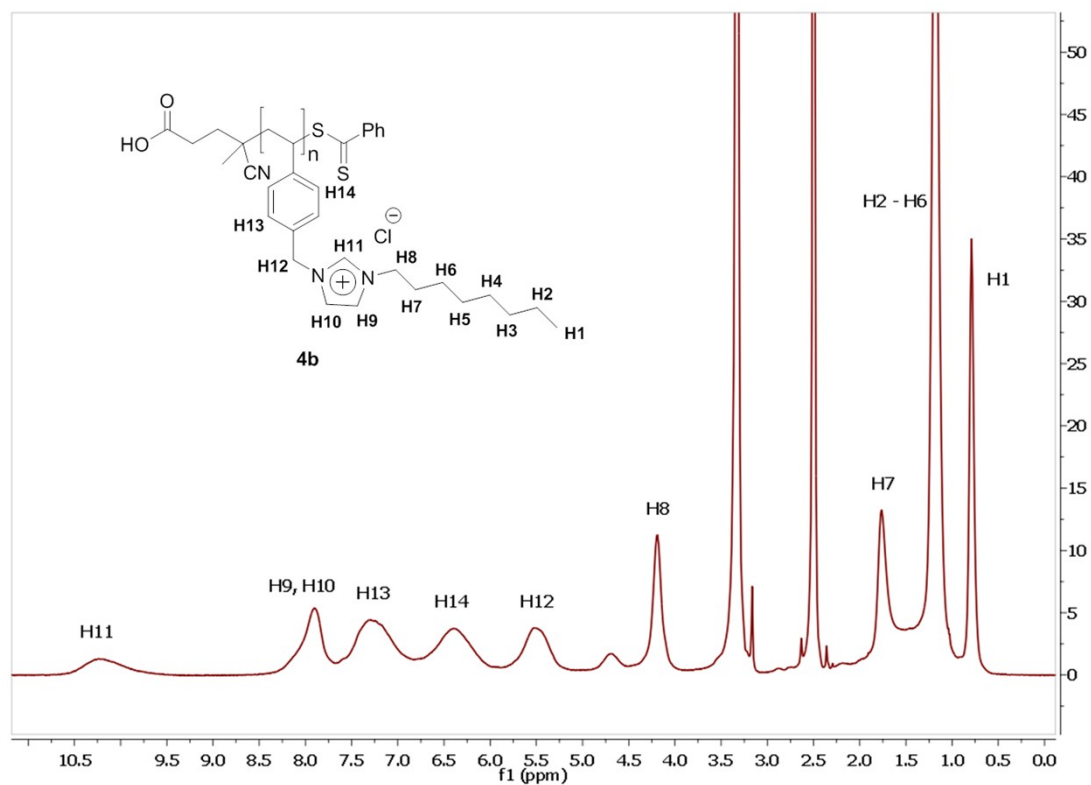

**Figure S21.**  $^1\text{H-NMR}$  (500 MHz) with peak assignments for **PIL-4b** ( $\text{DMSO-}d_6$ )

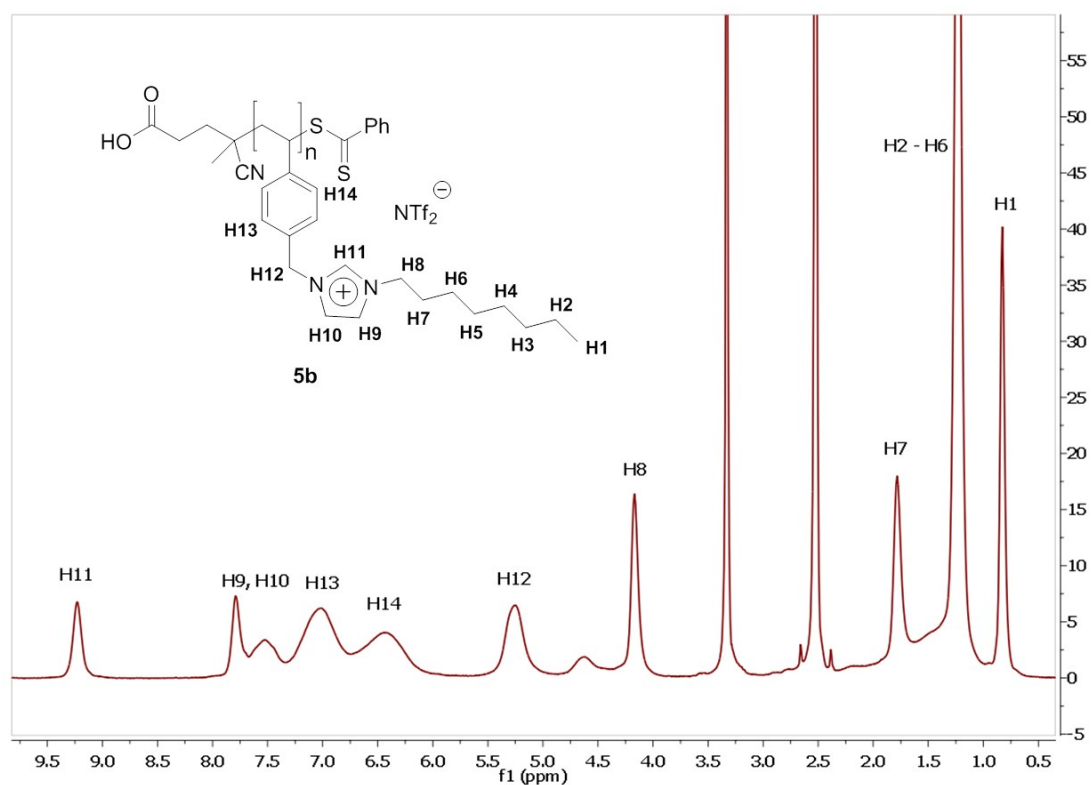

**Figure S22.**  $^1\text{H-NMR}$  (500 MHz) with peak assignments for **PIL-5b** ( $\text{DMSO-}d_6$ )

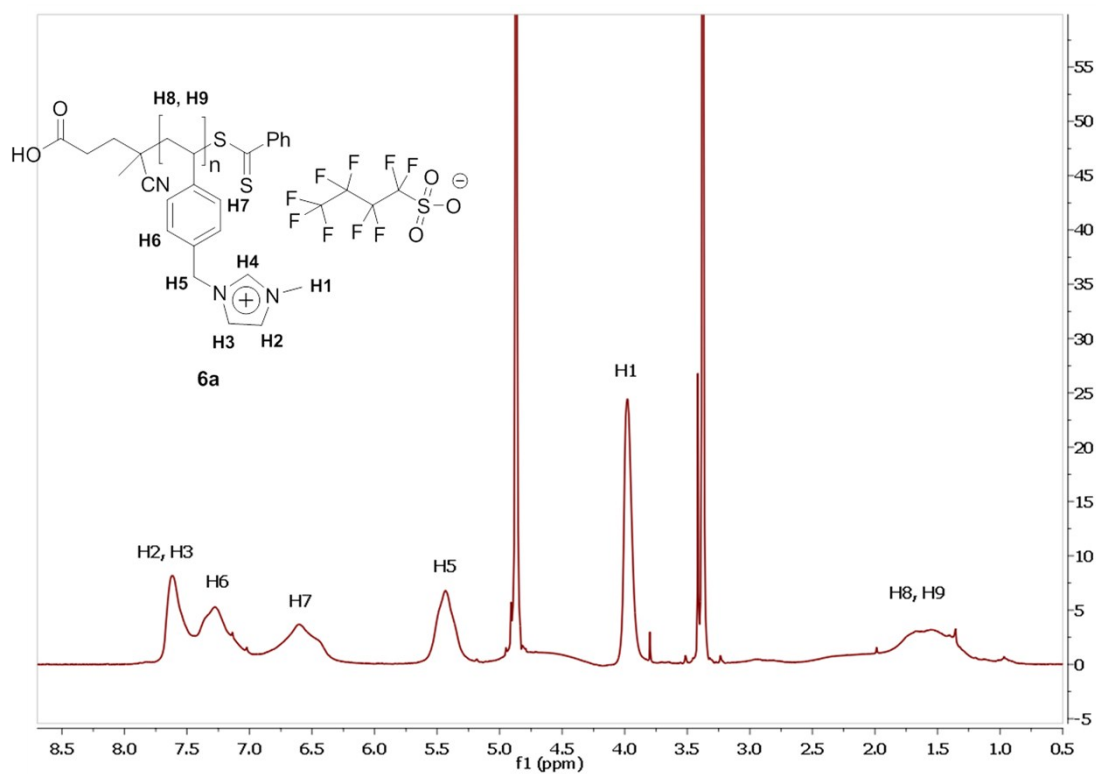

**Figure S23.**  $^1\text{H-NMR}$  (500 MHz) with peak assignments for **PIL-6a** ( $\text{MeOD}$ )

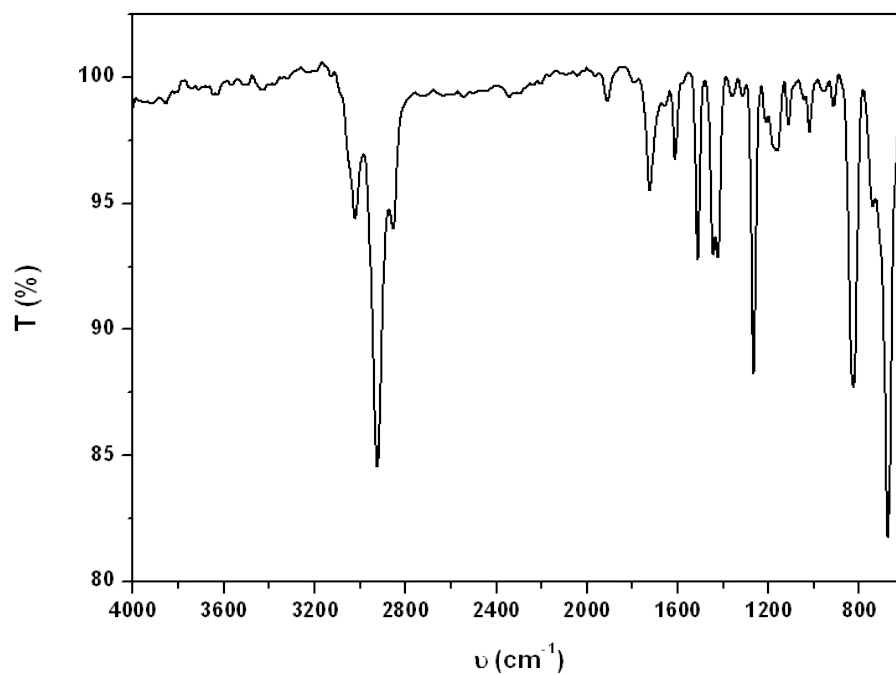

**Figure S24.** ATR-FT-IR for **2**

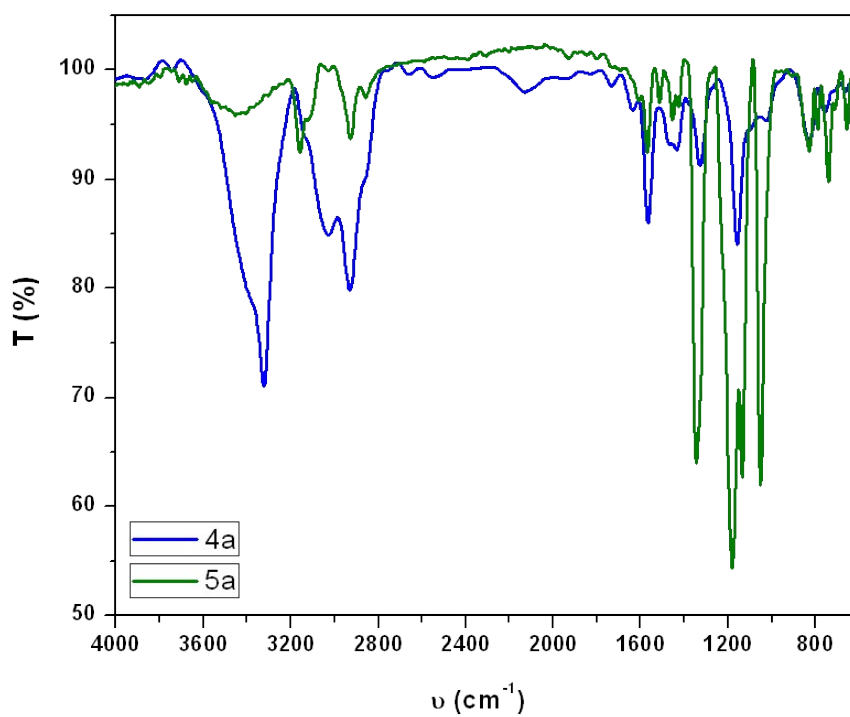

**Figure S25.** ATR-FT-IR for **PIL-4a** (*blue*) and **PIL-5a** (*green*)

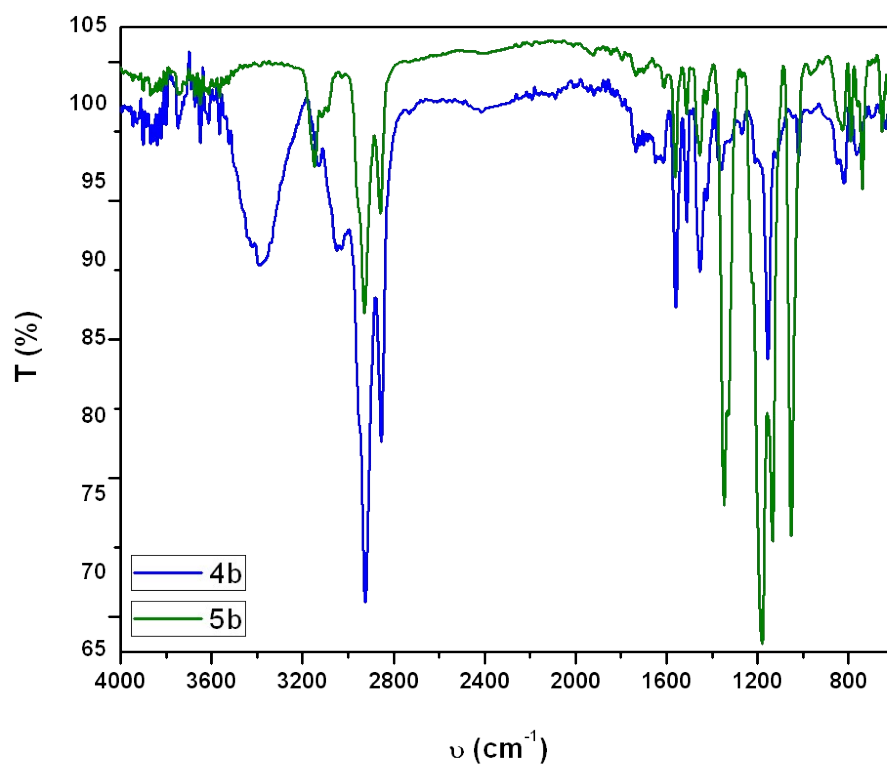

**Figure S26.** ATR-FT-IR for **PIL-4b** (blue) and **PIL-5b** (green)

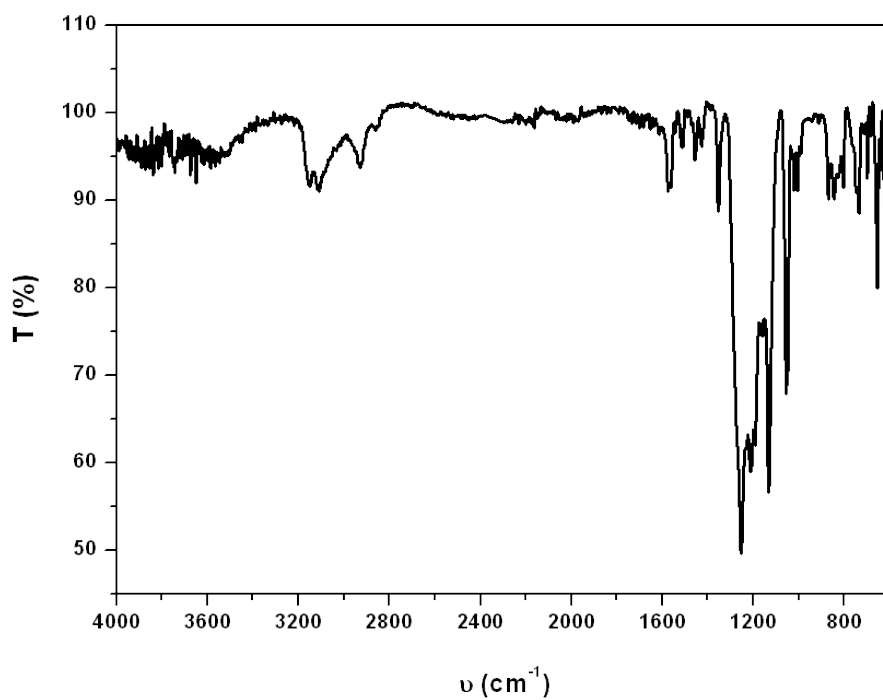

**Figure S27.** ATR-FT-IR for **PIL-6a**
